# Supplementary material
Source: publisher figshare collection journal article supplement (https://acs.figshare.com/ndownloader/files/4403416)
Supplement: Supplementary file 1 [file 4403416]

## **SUPPLEMENTARY INFORMATION**

### **Tripodal N-Heterocyclic Carbene Complexes of Palladium and Copper: Syntheses, Characterization and Catalytic Activity**

Charles E. Ellul, Graham Reed, Mary F. Mahon, Sofia I. Pascu and Michael K.

Whittlesey

*Department of Chemistry, University of Bath, Claverton Down, Bath BA2 7AY, UK*

k09mkw12

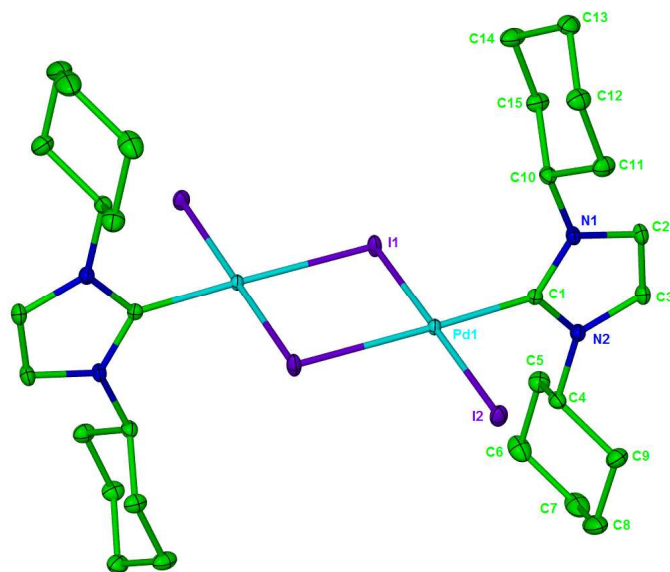

**Figure S1.** Molecular structure of  $[\text{Pd}(\text{ICy})\text{I}_2]_2$ . Thermal ellipsoids are represented at 30% probability. Hydrogen atoms are omitted for clarity. Selected bond lengths ( $\text{\AA}$ ) and angles ( $^\circ$ ): Pd(1)-C(1) 1.980(3), Pd(1)-I(1) 2.6068(3), Pd(1)-I(2) 2.5947(3), C(1)-Pd(1)-I(2) 88.37(8).
